# Supplementary material for: Early Treatment with Basal Insulin Glargine in People with Type 2 Diabetes: Lessons from ORIGIN and Other Cardiovascular Trials
Source: PubMed Central journal article supplement — Diabetes Ther. 2016 Feb 10;7(2):187–201. doi: 10.1007/s13300-016-0153-3 (PMC4900970; doi:10.1007/s13300-016-0153-3), 2016-02-10
Supplement: 13300_2016_153_MOESM1_ESM.pdf [file 13300_2016_153_MOESM1_ESM.pdf]

- Cardiovascular disease is the major cause of morbidity and mortality in people with abnormal glucose tolerance and type 2 diabetes mellitus, a progressive disease due to continuous loss of  $\beta$ -cell function in the face of increased insulin resistance.
- Starting insulin therapy at diagnosis of the disease or as add-on therapy to metformin and lowering blood glucose to near normal levels can reverse glucotoxicity and lipotoxicity and improve residual  $\beta$ -cell function.
- The Outcome Reduction With an Initial Glargine Intervention (ORIGIN) trial reported no increased risk of cardiovascular disease outcomes over the 6.7-year study period.
- Serious hypoglycemic episodes were few, with moderate weight gain, and less requirement for dual or triple oral treatment with basal insulin glargine than standard care; in a subgroup of persons in ORIGIN with pre-diabetes (12%), worsening of glycemic control was prevented.
- Early insulin therapy for the management of type 2 diabetes deserves consideration.

This summary slide represents the opinions of the authors. Sponsorship for this study was funded by Sanofi. Medical writing assistance for this study was provided by Lisa Swanson, Sandy Ong, Lisa Langley and Tom Claus and funded by Sanofi. For a full list of acknowledgments and disclosures for all authors of this article, please see the full text online. © The Author(s) 2016. Creative Commons Attribution Noncommercial License (CC BY-NC).
