# Supplementary material for: Early Treatment with Basal Insulin Glargine in People with Type 2 Diabetes: Lessons from ORIGIN and Other Cardiovascular Trials
Source: PubMed Central journal article supplement — Diabetes Ther. 2016 Feb 10;7(2):187–201. doi: 10.1007/s13300-016-0153-3 (PMC4900970; doi:10.1007/s13300-016-0153-3), 2016-02-10
Supplement: 13300_2016_153_MOESM2_ESM.pdf [file 13300_2016_153_MOESM2_ESM.pdf]

**Supplemental Material**

**Fig. S1** 24-hour plasma glucose and insulin profiles in healthy individuals (reprinted with permission from David Owens).

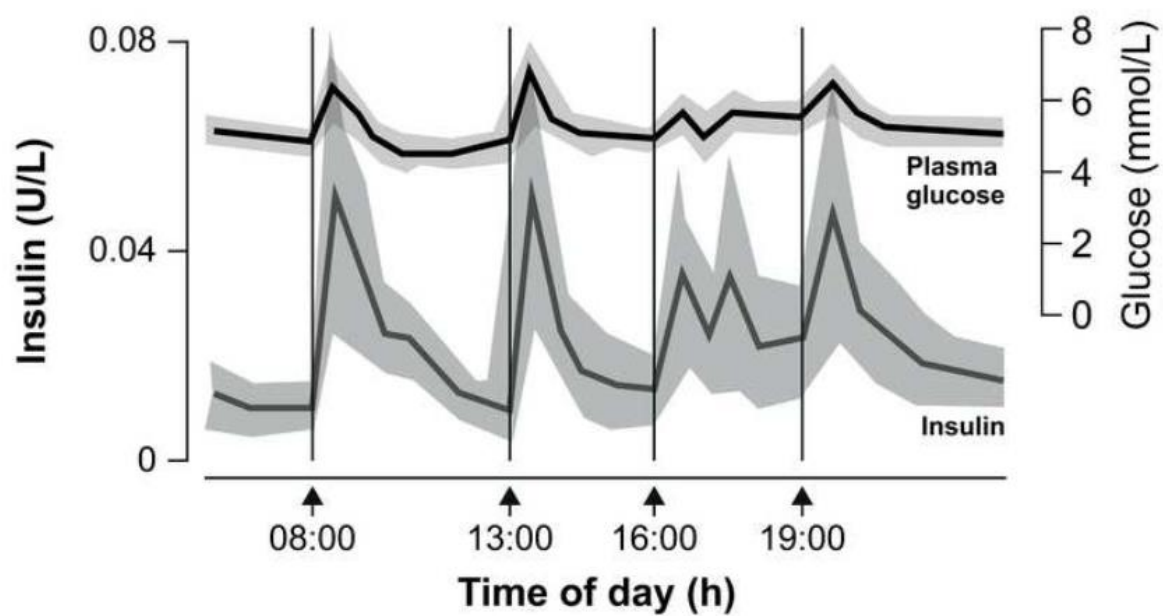

**Fig. S2** Progressive impairment of homeostatic mechanisms during development of T2DM.

**a** Progression of impaired glucose tolerance (reprinted with permission from Markolf Hanefeld), and **b** Progression of impaired homeostatic mechanisms associated with impairment of glucose tolerance: i) plasma glucose, ii) plasma insulin, iii) C-peptide, iv) pro-insulin (reprinted with permission from Markolf Hanefeld).

**Fig. S2a**

**Normal glucose tolerance**

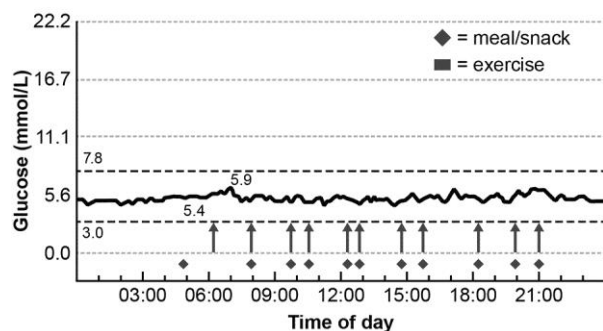

**Impaired glucose tolerance**

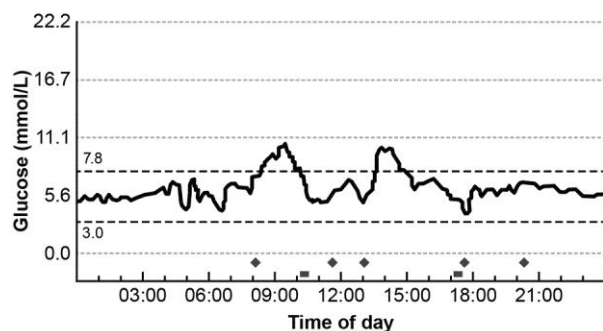

**Advanced T2DM**

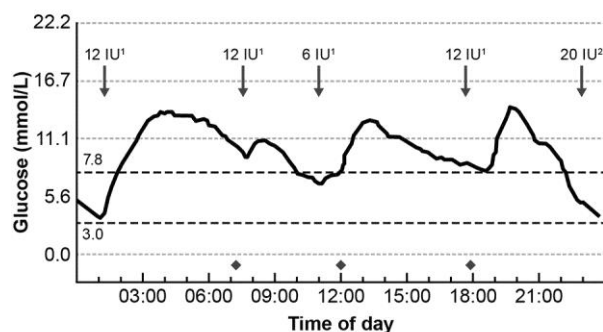

Fig. S2b

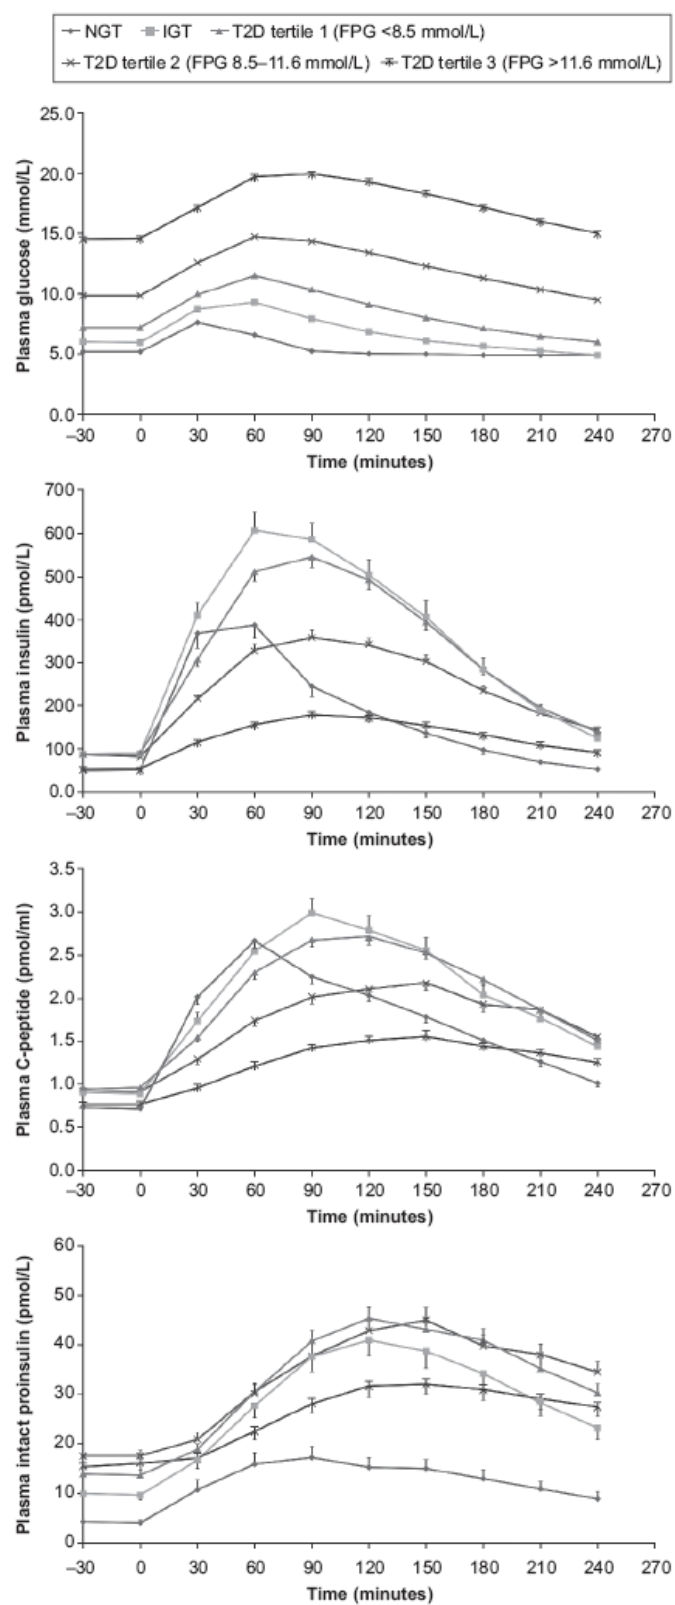

**Table S1** Studies of the effects of early insulin treatment on  $\beta$ -cell function in patients newly or recently diagnosed with T2DM

| Publication                                                                | Study type                             | Treatment duration | Patient population                  | Treatment                               | Outcome                                                                     |
|----------------------------------------------------------------------------|----------------------------------------|--------------------|-------------------------------------|-----------------------------------------|-----------------------------------------------------------------------------|
| Li Y et al. 2004 [46]<br>Xu et al. 2009 (2-year follow-up) [52]            | Open-label                             | 2 weeks            | Severely hyperglycemic (n = 138)    | Short-term intensive insulin            | Preservation of $\beta$ -cell function at 2 years (HOMA-B)                  |
| Weng et al. 2008 [42]                                                      | RCT                                    | 2 weeks            | Severely hyperglycemic (n = 382)    | Short-term intensive insulin vs. OAD    | Significant increase in $\beta$ -cell function in both groups (HOMA-B)      |
| Lingvay et al. 2009 [47]<br>Harrison et al. 2012 (3.5-year follow-up) [45] | Open-label intensive, then RCT vs. OAD | 3 months           | Relatively well controlled (n = 58) | Intensive insulin + OAD                 | Preservation of $\beta$ -cell function at 3.5 years (C-peptide and glucose) |
| Chon et al. 2010 [53]                                                      | Retrospective cohort                   | 5 months (mean)    | Severely hyperglycemic (n = 61)     | Intensive and non-intensive insulin     | Significant increase in $\beta$ -cell function (HOMA-B)                     |
| Mu et al. 2012 [48]                                                        | RCT                                    | 3 months           | Severely hyperglycemic (n = 129)    | Non-intensive insulin + OAD vs. OAD     | Significant increase in $\beta$ -cell function vs. OAD (HOMA-B)             |
| Pistrosch et al. 2013 [50]                                                 | Open-label                             | 36 weeks           | Mildly hyperglycemic (n = 75)       | Long-term non-intensive insulin vs. OAD | Significant increase in $\beta$ -cell function vs. OAD (HOMA-B)             |
| Kramer et al. 2013 [41]                                                    | Open-label                             | 4 weeks            | Relatively well controlled (n = 63) | Short-term intensive insulin            | Significant increase in $\beta$ -cell function (ISSI-2)                     |

*HOMA-B* Homeostasis Model Assessment-B, *ISSI-2* insulin secretion sensitivity index, *OAD* oral antidiabetes drug, *RCT* randomized controlled trial, *T2DM* type 2 diabetes mellitus
